# Supplementary material for: Adipose Derived Stem Cells Ameliorate Atopic Dermatitis by Down-regulating IL-17 Secretion of Th17 Cells in an Ovalbumin-induced Mouse Model
Source: Research Square preprint supplement (doi:10.21203/rs.3.rs-1014539/v1), 2021-10-29
Supplement: Supplementary file 1 [file 5f75a436076af000199727a2.docx]

Supplementary Table 1. Primer-probe sequences for quantitative real-time polymerase chain reaction

| Sample source | Gene name | 5’- Forward -3’ | 5’- Reverse -3’ |
| --- | --- | --- | --- |
| Skin | Actb | GAGGTATCCTGACCCTGAAGTA | CACACGCAGCTCATTGTAGA |
| IL-13 | GCTGAGCAACATCACACAAG | AATCCAGGGCTACACAGAAC |
| IL-4 | GACGGCACAGAGCTATTGAT | GGATATGGCTCCTGGTACATTC |
| IL-4R | CCTACACTACAGGCTGATGTTC | TGGACCGGCCTATTCATTTC |
| IL-17A | CAAACATGAGTCCAGGGAGAG | GCTGAGCTTTGAGGGATGAT |
| IFN-γ | ATCGGCTGACCTAGAGAAGA | AGCCAAGATGCAGTGTGTAG |
| TNF-α | CTACCTTGTTGCCTCCTCTTT | GAGCAGAGGTTCAGTGATGTAG |
| Th17 cells | IL-17A | CAAACATGAGTCCAGGGAGAG | GCTGAGCTTTGAGGGATGAT |
| IL-17F | GTCGCCATTCAGCAAGAAATC | GAGCATCTTCTCCAACCTGAA |
| RORγt | CCTTCCCTCCACTCTATAAGGA | GTCAGAGGGCTGAAGGAAATAG |
| ADSCs | PD-L1 | GAGTGCAGATTCCCTGTAGAAC | CTCTCCTGCCACAAACTGAA |
| TGF-β | GGTGGTATACTGAGACACCTTG | CCCAAGGAAAGGTAGGTGATAG |
| PGE2 | CAGTCCAGTGCCAGTAAACA | CCCTTACACTTCTCCAATGAGG |
